# Supplementary material
Source: PubMed Central journal article supplement (PMC5196007)
Supplement: NIHMS834480-supplement-sup.pdf [file NIHMS834480-supplement-sup.pdf]

## Supplementary Material

### **A quantitative LC-MS/MS method for simultaneous determination of cocaine and its metabolites in whole blood**

Xiabin Chen, Xirong Zheng, Kai Ding, Ziyuan Zhou, Chang-Guo Zhan,\* and Fang Zheng\*

Molecular Modeling and Biopharmaceutical Center and Department of Pharmaceutical Sciences, College of Pharmacy, University of Kentucky, 789 South Limestone Street, Lexington, KY 40536

#### **Calibration curves**

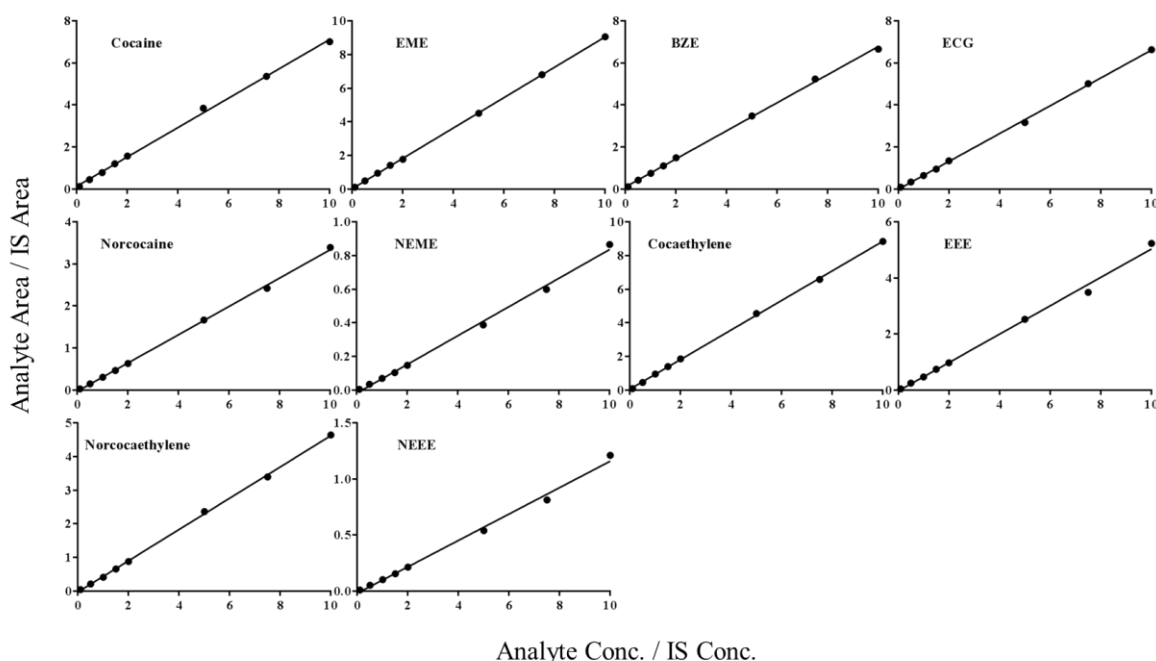

Figure S1. LC-MS/MS calibration curves for cocaine and its metabolites. Calibration curves were established by calculating the ratios of the peak area for analyte to that for the internal standard and plotting the ratio as a function of the ratio of the analyte concentration to the internal standard. X-axis (Analyte Conc. / IS Conc.) refers to the ratio of the analyte concentration to the corresponding internal standard concentration (IS Conc. = 0.1  $\mu$ M for each internal standard compound). Y-axis (Analyte Area / IS Area) represents the ratio of the measured area for the analyte to that for the corresponding internal standard. For each compound (cocaine or a metabolite), data were fitted to a linear curve using the least-squares analysis with 1/x weighting.
